# Supplementary material for: Technical Note—Preservation of Quasi-K-Concavity and Its Applications
Source: Atypon-hosted journal article supplement (doi:10.1287/opre.1090.0802), 2010-04-10
Supplement: opre.1090.0802-sm-ec.pdf [file opre.1090.0802-sm-ec.pdf]

**e - c o m p a n i o n**

ONLY AVAILABLE IN ELECTRONIC FORM

Electronic Companion—“Preservation of Quasi- $K$ -Concavity and Its Applications” by Xin Chen, Yuhan Zhang, and Sean X. Zhou,  
*Operations Research*, DOI 10.1287/opre.1090.0802.

---

# Online Appendix: Preservation of Quasi- $K$ -Concavity and Its Applications

Xin Chen\*    Yuhan Zhang\*    Sean X. Zhou †

July 2009

## Appendix

To prove Theorem 1, we need the following result.

**Proposition 1** *Let  $\alpha(\cdot)$  be a concave function in a bounded interval  $\mathcal{D} = [d, \bar{d}]$  and  $\beta(\cdot)$  be a continuous function. There exists a  $d(y)$  maximizing  $\alpha(d) + \beta(y - d)$  for  $d \in \mathcal{D}$  such that  $y - d(y)$  is an increasing function of  $y$ .*

To prove the above result, one can first replace  $d$  by a new variable  $\tilde{d} = y - d$ . Since  $\alpha(\cdot)$  is concave and  $\beta(\cdot)$  is a function of a single variable, the function  $\alpha(y - \tilde{d}) + \beta(\tilde{d})$  is supermodular in  $(y, \tilde{d})$ . Thus, there exists a  $\tilde{d}(y)$  maximizing  $\alpha(y - \tilde{d}) + \beta(\tilde{d})$  such that  $\tilde{d}(y)$  is increasing in  $y$  (note that  $\tilde{d}(y)$  can be chosen as either the largest optimal solution for all  $y$  or the smallest optimal solution for all  $y$ ). Then the above lemma holds for  $d(y) = y - \tilde{d}(y)$ .

---

\*Department of Industrial Enterprise and Systems Engineering, University of Illinois at Urbana- Champaign. Email: xinchen@illinois.edu, yzhang30@illinois.edu. This work is partly supported by the National Science Foundation Grants CMMI-0653909 and CMMI-0926845 ARRA.

†Department of Systems Engineering and Engineering Management, Chinese University of Hong Kong, zhoux@se.cuhk.edu.hk

## Proof of Theorem 1

Define  $d(y) = \min\{d : d \in \arg \max_{d \in \mathcal{D}} [\alpha(d) + \beta(y - d)]\}$ . By Proposition ??,  $y - d(y)$  is increasing.

Define

$$y_0 = \sup\{y : \Gamma(y) \text{ is non-decreasing on } (-\infty, y]\}.$$

We claim that  $d(y_0) \in \{\arg \max_{d \in \mathcal{D}} \alpha(d)\}$ . In the sequel, we will first prove the lemma under this claim. The proof for the claim itself will be provided after that.

Note that if  $\Gamma(\cdot)$  is indeed quasi- $K$ -concave,  $y_0$  defined above would be its largest changeover point. Therefore, to prove the lemma, it is sufficient to show that  $\Gamma(y)$  is non- $K$ -increasing for  $y \geq y_0$  or for  $y_0 \leq y_2 \leq y_1$

$$\Gamma(y_2) \geq \Gamma(y_1) - K.$$

Let  $\xi^0 > 0$  be the largest changeover of  $\beta(y)$ . One should note that, if  $\xi^0 = \infty$ , then  $y_0 = \infty$  and the lemma is clearly true. So in the following proof,  $\xi^0$  is assumed to be finite.

We first show the right-continuity of  $y - d(y)$  at  $y = y_0$ . Since  $y - d(y)$  is increasing in  $y$ ,  $\lim_{y \rightarrow y_0^+} y - d(y)$  always exists (superscript “+” means taking the right limit) and it is sufficient to show that it equals  $y_0 - d(y_0)$ . Assume  $\lim_{y \rightarrow y_0^+} y - d(y) = y_0 - \tilde{d}$  for some  $\tilde{d} \geq 0$ . Then by continuity of  $\Gamma(\cdot)$ ,

$$\Gamma(y_0) = \alpha(\tilde{d}) + \beta(y_0 - \tilde{d})$$

and so  $\tilde{d} \in \{\arg \max_d [\alpha(d) + \beta(y_0 - d)]\}$ . Furthermore, by the monotonicity of  $y - d(y)$  we have  $y_0 - \tilde{d} = \lim_{y \rightarrow y_0^+} y - d(y) \geq y_0 - d(y_0)$ . Hence,  $\tilde{d} \leq d(y_0)$ . As  $d(y_0)$  is assumed to be the smallest maximizer of  $[\alpha(d) + \beta(y_0 - d)]$ ,  $\tilde{d} = d(y_0)$  and  $\lim_{y \rightarrow y_0^+} y - d(y) = y_0 - d(y_0)$ .

We next show by contradiction that  $y_0 - d(y_0) \geq \xi^0$ . Suppose  $y_0 - d(y_0) < \xi^0$ , by right-continuity of  $y - d(y)$  at  $y_0$  there exists a number  $\eta > 0$  such that for any  $y \leq y'$  in the interval  $[y_0, y_0 + \eta]$ ,  $y_0 - d(y_0) \leq y - d(y) \leq y' - d(y') \leq \xi^0$ . We can show that  $\Gamma(y)$  is non-decreasing in this interval  $[y_0, y_0 + \eta]$  with  $\eta > 0$ :

$$\begin{aligned} \Gamma(y') &= \alpha(d(y')) + \beta(y' - d(y')) \\ &\geq \alpha(d(y)) + \beta(y' - d(y)) \\ &\geq \alpha(d(y)) + \beta(y - d(y)) \\ &= \Gamma(y), \end{aligned}$$

where the first inequality follows from the fact that  $d(y')$  is optimal for  $\Gamma(y')$ ; the second inequality holds because  $\beta(\cdot)$  is increasing on  $(-\infty, \xi^0]$ . This contradicts with the definition of  $y_0$ . Therefore,  $y_0 - d(y_0) \geq \xi^0$ .

Now we focus our attention on  $\xi^0 \leq y_2 - d(y_2) \leq y_1 - d(y_1)$ , we verify the lemma by discussing several different cases.

If  $d(y_2) \geq d(y_1)$ , then  $y_2 - d(y_1) \geq y_2 - d(y_2) \geq \xi^0$  and therefore

$$\begin{aligned}\Gamma(y_2) &= \alpha(d(y_2)) + \beta(y_2 - d(y_2)) \\ &\geq \alpha(d(y_1)) + \beta(y_2 - d(y_1)) \\ &\geq \alpha(d(y_1)) + \beta(y_1 - d(y_1)) - K \\ &= \Gamma(y_1) - K,\end{aligned}$$

where the first inequality follows from the optimality of  $d(y_2)$  and the second one from the non- $K$ -increasing of  $\beta(y)$  for  $y \geq \xi^0$ .

If  $d(y_2) < d(y_1)$ , then we have the following two different cases:

Case I:  $d(y_0) \geq d(y_2)$ . In this case, obviously  $y_2 - d(y_0) \leq y_2 - d(y_2)$ .

$$\begin{aligned}\Gamma(y_2) &= \alpha(d(y_2)) + \beta(y_2 - d(y_2)) \\ &\geq \alpha(d(y_0)) + \beta(y_2 - d(y_0)) \\ &\geq \alpha(d(y_0)) + \beta(y_1 - d(y_1)) - K \\ &\geq \alpha(d(y_1)) + \beta(y_1 - d(y_1)) - K \\ &= \Gamma(y_1) - K,\end{aligned}$$

where the second inequality follows from  $\xi^0 \leq y_0 - d(y_0) \leq y_2 - d(y_0) \leq y_2 - d(y_2) \leq y_1 - d(y_1)$  and the last one from the optimality of  $d(y_0)$  for  $\alpha(d)$  that we claimed.

Case II:  $d(y_2) > d(y_0)$ .

$$\begin{aligned}\Gamma(y_2) &= \alpha(d(y_2)) + \beta(y_2 - d(y_2)) \\ &\geq \alpha(d(y_2)) + \beta(y_1 - d(y_1)) - K \\ &\geq \alpha(d(y_1)) + \beta(y_1 - d(y_1)) - K \\ &= \Gamma(y_1) - K,\end{aligned}$$

where the first inequality follows from the non- $K$ -increasing of  $\beta(y)$  and the second one follows from the concavity of  $\alpha(d)$  and that  $d(y_0)$  is its maximizer.

The above cases cover all possibilities and we have proved the lemma under the claim that  $d(y_0)$  is a maximizer of  $\alpha(d)$ . We now turn to prove the claim itself. Observe that  $d(y_0)$  can either lie in the interior of  $\mathcal{D} = [\underline{d}, \bar{d}]$  or on its boundary. We distinguish between these two cases. If  $d(y_0)$  is an interior point of  $\mathcal{D}$ , then from the first order optimality condition,

$$\alpha'(d(y_0)) = \beta'(y_0 - d(y_0)).$$

If  $\alpha'(d(y_0)) > 0$ , then  $\beta'(y_0 - d(y_0)) > 0$ . Since  $\beta(\cdot)$  is continuously differentiable,  $\beta'(x) > 0$  for  $x$  in a small neighborhood of  $y_0 - d(y_0)$ . As  $\lim_{y \rightarrow y_0^+} d(y) = d(y_0)$ , one can show that there exists a small neighborhood  $\mathcal{U}$  of  $y_0$  such that for any  $y', y \in \mathcal{U}$  with  $y' > y > y_0$ ,  $\beta(y' - d(y)) > \beta(y - d(y))$ . Then

$$\begin{aligned} \Gamma(y') &= \alpha(d(y')) + \beta(y' - d(y')) \\ &\geq \alpha(d(y)) + \beta(y' - d(y)) \\ &> \alpha(d(y)) + \beta(y - d(y)) \\ &= \Gamma(y). \end{aligned}$$

This contradicts with the definition of  $y_0$ .

If  $\alpha'(d(y_0)) < 0$ , then  $\beta'(y_0 - d(y_0)) < 0$ . There exists some  $y' < y_0$  that is sufficiently close to  $y_0$  such that  $\beta(y' - d(y_0)) > \beta(y_0 - d(y_0))$ . Then

$$\begin{aligned} \Gamma(y') &= \alpha(d(y')) + \beta(y' - d(y')) \\ &\geq \alpha(d(y_0)) + \beta(y' - d(y_0)) \\ &> \alpha(d(y_0)) + \beta(y_0 - d(y_0)) \\ &= \Gamma(y_0), \end{aligned}$$

which also contradicts with the definition of  $y_0$ . Therefore,  $\alpha'(d(y_0)) = 0$  and  $d(y_0)$  is an interior maximizer for  $\alpha(\cdot)$ .

We next consider the case where  $d(y_0)$  is on the boundary of  $\mathcal{D}$ . Consider first  $d(y_0) = \underline{d}$ . From the first order optimality condition, we have that

$$\alpha'(\underline{d}) - \beta'(y_0 - \underline{d}) \leq 0.$$

We need to show that  $\underline{d}$  is a maximizer of  $\alpha(d)$  in  $\mathcal{D}$ . Suppose this is not true, then as  $\alpha(d)$  is differentiable and concave,  $\alpha'(\underline{d}) > 0$  and therefore  $\beta'(y_0 - \underline{d}) > 0$ . By an argument similar to the one used in the previous two paragraphs, we can show that for  $y' \geq y > y_0$  with  $y'$  sufficiently close to  $y_0$ ,

$$\begin{aligned}\Gamma(y') &= \alpha(d(y')) + \beta(y' - d(y')) \\ &\geq \alpha(d(y)) + \beta(y' - d(y)) \\ &\geq \alpha(d(y)) + \beta(y - d(y)) \\ &= \Gamma(y),\end{aligned}$$

where the last inequality follows from the fact that  $\beta'(y_0 - \underline{d}) > 0$  and the continuity of  $\beta(\cdot)$ . This contradicts with the definition of  $\Gamma(y_0)$ . Therefore,  $\underline{d}$  is a maximizer of  $\alpha(d)$ . The case that  $d(y_0) = \bar{d}$  can be similarly proven. Thus we have proved our claim that  $d(y_0) \in \{\arg \min_{d \in \mathcal{D}} \alpha(d)\}$ . This concludes the proof of Theorem 1.

## Proof of Theorem 2

Since part (b) has been implicitly proven and used in Chen and Simchi-Levi [?], we focus on part (a).

Let  $d(y) \in \arg \max_{d \in \mathcal{D}} [\alpha(d) + \beta(y - d)]$  (its existence is guaranteed by the continuity of  $\alpha(\cdot)$  and  $\beta(\cdot)$ ) and  $d^*$  be a maximizer of  $\alpha(\cdot)$  in  $\mathcal{D}$ . First note that if  $\beta(\cdot)$  does not have a finite maximizer, then it must be monotone. In this case, we can show that  $\Gamma(\cdot)$  is also monotone. We only prove the case in which  $\beta(\cdot)$  is increasing (the case in which  $\beta(\cdot)$  is decreasing can be proven similarly). Let  $y_1 \leq y_2$ . Then

$$\Gamma(y_1) = \alpha(d(y_1)) + \beta(y_1 - d(y_1)) \leq \alpha(d(y_1)) + \beta(y_2 - d(y_1)) \leq \alpha(d(y_2)) + \beta(y_2 - d(y_2)) = \Gamma(y_2),$$

where the first inequality holds since  $\beta(\cdot)$  is increasing and the remaining equalities and inequality follow from the definition of  $d(y)$ .

We now assume that  $\beta(\cdot)$  has a finite maximizer, denoted as  $x^*$ . It is not hard to show that  $y^* = x^* + d^*$  is a maximizer of the function  $\Gamma(\cdot)$ . We can show that  $\Gamma(\cdot)$  is increasing in  $(-\infty, y^*]$  and decreasing in  $[y^*, \infty)$ . Let  $y < y^*$  and  $\eta = y^* - y$ . To this end, we prove that  $\Gamma(\cdot)$  is increasing in

a neighborhood of  $y$ . Since  $y < y^*$ , either  $d^* - d(y)$  or  $y^* - d^* - (y - d(y))$  must be no less than  $\eta/2$ . We focus on the case with  $d^* - d(y) \geq \eta/2$  (Note that the other case is symmetric). In this case, for any  $y' \in [y, y + \eta/2]$ , let  $d = d(y) + y' - y$ . Then  $d(y) \leq d \leq d^*$ ,  $y' - d = y - d(y)$ , and therefore

$$\Gamma(y) = \alpha(d(y)) + \beta(y - d(y)) \leq \alpha(d) + \beta(y' - d) \leq \Gamma(y'),$$

where the first inequality holds since  $\alpha(d)$  is increasing for  $d \leq d^*$ . We next prove that  $\Gamma(y') \leq \Gamma(y)$  for any  $y' \in [y - \eta/2, y]$ . For a given  $y' \in [y - \eta/2, y]$ , if  $y' - d(y') \leq y^* - d^*$ , then

$$\Gamma(y') = \alpha(d(y')) + \beta(y' - d(y')) \leq \alpha(d(y')) + \beta(y - d(y')) \leq \Gamma(y),$$

where the first inequality holds since  $\beta(\cdot)$  is increasing in  $(-\infty, y^* - d^*]$ ; if  $y' - d(y') \geq y^* - d^*$ , denoting  $d = d(y') + (y - y')$ , we have that  $d(y') \leq d \leq d^*$ ,  $y - d = y' - d(y')$  and

$$\Gamma(y') = \alpha(d(y')) + \beta(y' - d(y')) \leq \alpha(d) + \beta(y - d) \leq \Gamma(y),$$

where the first inequality holds since  $\alpha(d)$  is increasing for  $d \leq d^*$ . Thus,  $\Gamma(\cdot)$  is increasing in  $(-\infty, y^*]$ . Similarly, we can prove that  $\Gamma(\cdot)$  is decreasing in  $[y^*, \infty)$ .
